# Supplementary material for: Contribution of Interneuron Subtype-Specific GABAergic Signaling to Emergent Sensory Processing in Mouse Somatosensory Whisker Barrel Cortex
Source: PubMed Central journal article supplement (PMC9201598; doi:10.1093/cercor/bhab363), 2021-10-06
Supplement: baruchin_supplementarymaterials_final_bhab363.pdf [file baruchin_supplementarymaterials_final_bhab363.pdf]

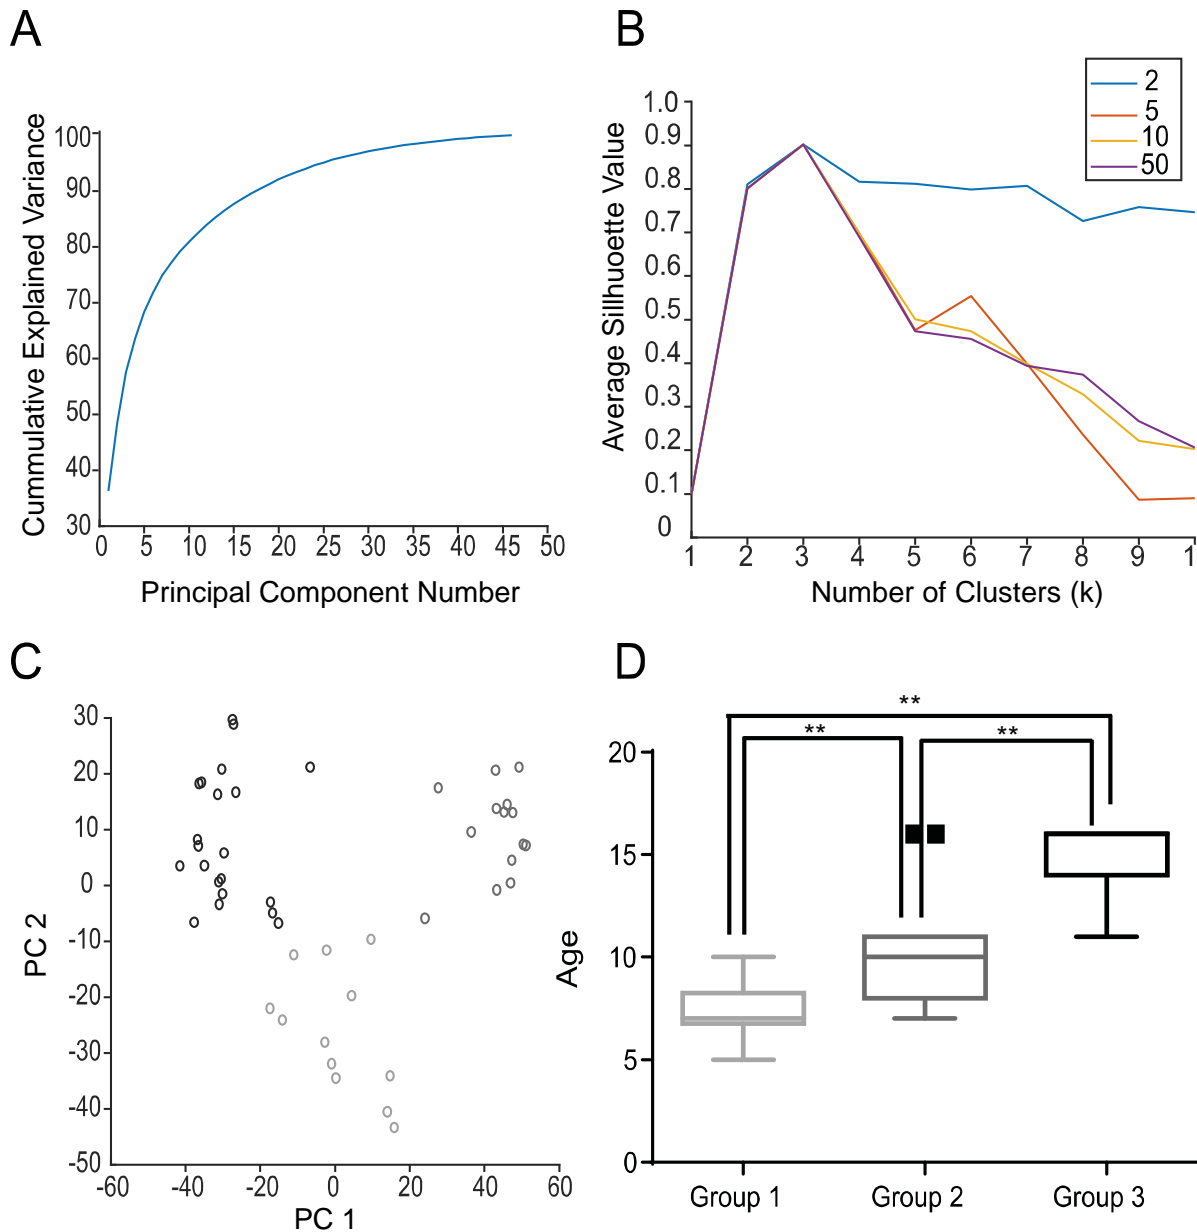

**Figure S1. A.** The cumulative explained variance according to number of principal components. **B.** The average silhouette value against the k-number (number of clusters) used. The different line colours show the number of components used for the k-mean clustering. **C.** Principal component plot of the three clusters determined through k-means analysis. **D.** The animal age in the three groups resulting from clustering. There was a significant main effect for group ( $F(2,44) = 71.01, p < 0.0001$ ). \*\* $p < 0.001$ .

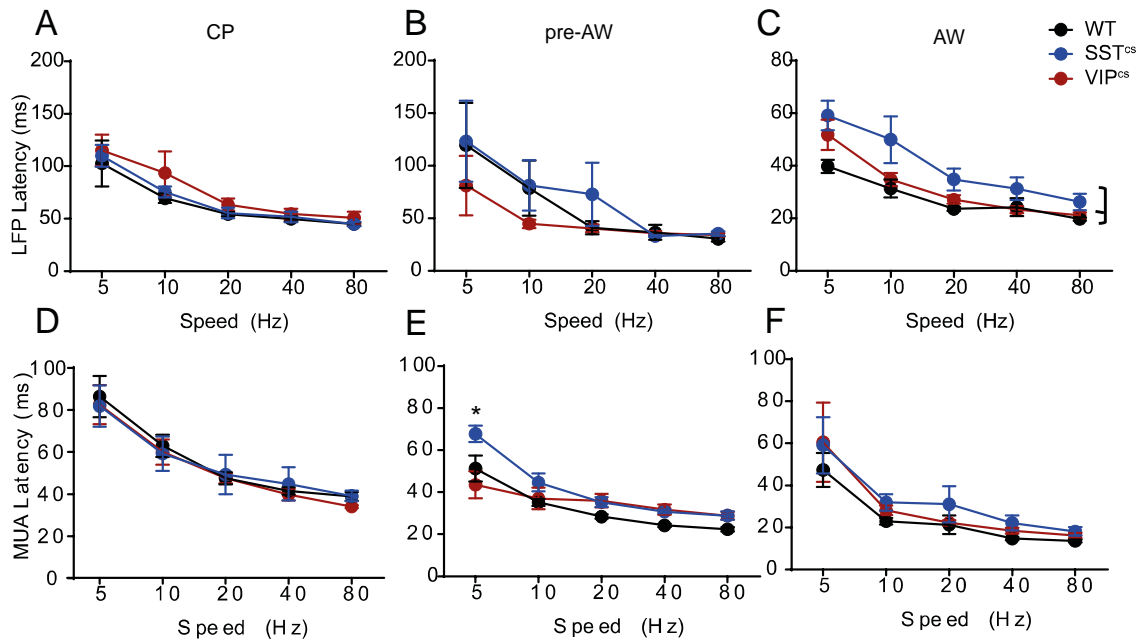

**Figure S2. A.** The average peak LFP latency of WT, SST<sup>CS</sup> and VIP<sup>CS</sup> animals during CP. There was a significant effects for speed ( $F(4,98) = 25.26$ ,  $p < 0.001$ ) but not for genotype ( $F(2,98) = 2.14$ ,  $p = 0.123$ ). **B.** The average LFP latency of WT, SST<sup>CS</sup> and VIP<sup>CS</sup> animals during pre-AW. There was a significant effects for speed ( $F(4,85) = 5.826$ ,  $p < 0.001$ ) but not for genotype ( $F(2,85) = 1.148$ ,  $p = 0.322$ ). **C.** The average LF latency of WT, SST<sup>CS</sup> and VIP<sup>CS</sup> animals during AW. There was a significant effect for speed ( $F(4,152) = 24.33$ ,  $p < 0.001$ ) and for genotype ( $F(2,152) = 15.35$ ,  $p < 0.001$ ). **D.** The MUA latency of WT, SST<sup>CS</sup> and VIP<sup>CS</sup> animals during CP. There was an effect for speed ( $F(4,70) = 30.04$ ,  $p < 0.01$ ), but not for genotype ( $F(2,70) = 0.75$ ,  $p = 0.475$ ). **E.** The average MUA latency of WT, SST<sup>CS</sup> and VIP<sup>CS</sup> animals during pre-AW. There was a genotype X speed interaction ( $F(8,60) = 2.374$ ,  $p < 0.05$ ), due to SST<sup>CS</sup> being slower at 1Hz deflections ( $p < 0.05$ ). **F.** The average MUA latency of WT, SST<sup>CS</sup> and VIP<sup>CS</sup> animals during AW. There was an effect for speed ( $F(4,147) = 15.29$ ,  $p < 0.001$ ), but not for genotype ( $F(2,147) = 2.488$ ,  $p = 0.086$ ). Brackets signify  $p < 0.05$  for a post-hoc multiple comparison. \*  $p < 0.05$  for a simple *post hoc* multiple comparison.

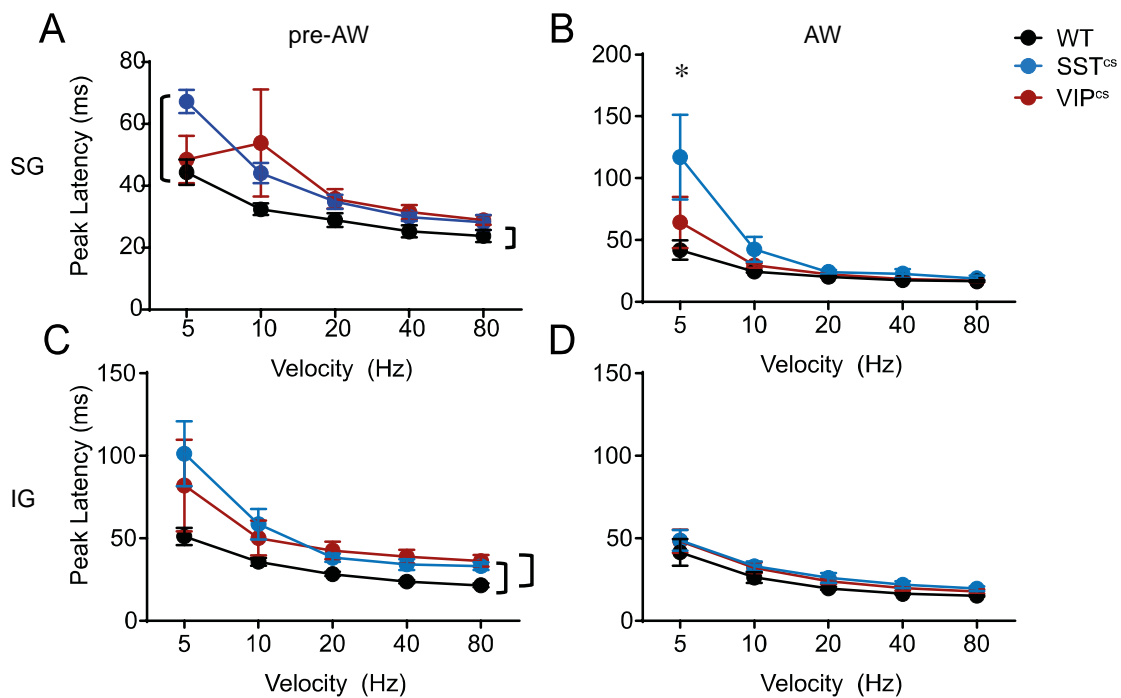

**Figure S3.** The effect of VIP+ and SST+ IN silencing of response latency. **A.** Average response latencies in SG layers during pre-AW. There was an effect for both speed ( $F(4,58) = 11.51, p < 0.01$ ) and genotype ( $F(2,58) = 4.71, p < 0.01$ ). **B.** Average response latencies in SG layers during AW. There was an interaction between genotype and speed ( $F(8,142) = 4.44, p < 0.01$ ). The interaction stemmed from the 5 Hz deflection where both silenced genotypes had slower latencies ( $p < 0.01$ ). **C.** average response latencies in IG layers during pre-AW. There was an effect for both speed ( $F(4,68) = 14.10, p < 0.01$ ) and genotype ( $F(2,68) = 8.17, p < 0.01$ ). **D.** Average response latencies in IG layers during AW. There was only an effect for speed ( $F(4,142) = 13.22, p < 0.01$ ), but not for genotype ( $F(2,142) = 2.31, p = 0.10$ )

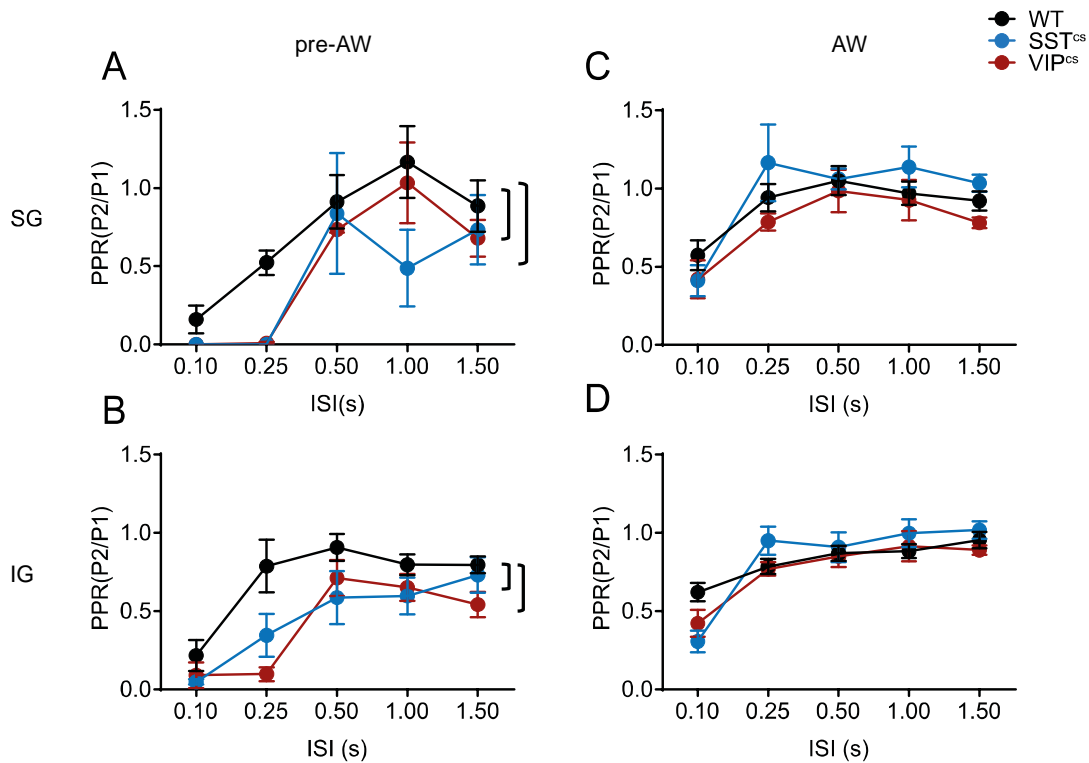

**Figure S4. A.** The average PPR of the MUA response in the SG layer of WT, SST<sup>cs</sup>, and VIP<sup>cs</sup> animals during pre-AW. There was an effect for both ISI ( $F(4,100) = 11.61, p < 0.01$ ) and genotype ( $F(2,100) = 4.336, p < 0.05$ ; WT: N = 13, SST<sup>cs</sup>: N = 4, VIP<sup>cs</sup>: N = 6). **B.** The average PPR of the MUA response in the IG layer of WT, SST<sup>cs</sup>, and VIP<sup>cs</sup> animals during pre-AW. There was an effect for both ISI ( $F(4,120) = 11.40, p < 0.01$ ) and genotype ( $F(2,120) = 9.013, p < 0.01$ ; WT: N = 18, SST<sup>cs</sup>: N = 4, VIP<sup>cs</sup>: N = 6). **C.** The average PPR of the MUA response in the SG layer of WT, SST<sup>cs</sup>, and VIP<sup>cs</sup> animals during AW. There was an effect for ISI ( $F(4,173) = 8.521, p < 0.01$ ), but not for genotype ( $F(2,173) = 1.673, p = 0.191$ ; WT: N = 27, SST<sup>cs</sup>: N = 5, VIP<sup>cs</sup>: N = 6). **D.** The average PPR of the MUA response in the IG layer of WT, SST<sup>cs</sup>, and VIP<sup>cs</sup> animals during AW. There was an effect for ISI ( $F(4,188) = 16.46, p < 0.01$ ) but not for genotype ( $F(2,88) = 0.671, p = 0.512$ ; WT: N = 30, SST<sup>cs</sup>: N = 6, VIP<sup>cs</sup>: N = 6)
